# **Diffusion-MRI-based regional cortical microstructure at birth for predicting neurodevelopmental outcomes at 2 years of age**

Minhui Ouyang<sup>1</sup>, Qinmu Peng<sup>1, 2</sup>, Tina Jeon<sup>1</sup>, Roy Heyne<sup>3</sup>, Lina Chalak<sup>3</sup>, Hao Huang<sup>1, 2\*</sup>

<sup>1</sup>Radiology Research, Children's Hospital of Philadelphia, PA, United States

<sup>2</sup>Department of Radiology, Perelman School of Medicine, University of Pennsylvania, PA, United States

<sup>3</sup>Department of Pediatrics, University of Texas Southwestern Medical Center, Dallas, TX, United States

\*Corresponding Author:

Hao Huang, Ph.D.

34th street and Civic Center blvd,  
Philadelphia, PA 19104;

## Abstract

Brain cerebral cortical architecture encoding regionally differential dendritic arborization and synaptic formation at birth underlies human behavior emergence at 2 years of age. Brain changes in 0-2 years are most dynamic across lifespan. Effective prediction of future behavior with brain microstructure at birth will reveal structural basis of behavioral emergence in typical development, and identify biomarkers for early detection and tailored intervention in atypical development. Here, we aimed to evaluate the neonate whole-brain cortical microstructure quantified by diffusion MRI for predicting future behavior. We found that individual cognitive and language functions assessed at age of 2 years were robustly predicted by neonate cortical microstructure using support vector regression. Remarkably, cortical regions contributing heavily to the prediction models exhibited distinctive functional selectivity for cognition and language. These findings highlight regional cortical microstructure at birth as potential sensitive biomarker in predicting future neurodevelopmental outcomes and identifying individual risks of brain disorders.

**Keywords:** cortical microstructure, prediction, diffusion MRI, development, behavior, infants

## Introduction

Brain cerebral cortical microstructure underlies neuronal circuit formation and function emergence during brain maturation. Regionally distinctive cortical microstructural architecture profiles around birth result from immensely complicated and spatiotemporally heterogeneous underlying cellular and molecular processes (Silbereis et al., 2016), including neurogenesis, synapse formation, dendritic arborization, axonal growth, pruning and myelination. Disturbance of such precisely regulated maturational events is associated with mental disorders (Innocenti and Price, 2005). Diffusion magnetic resonance imaging (dMRI) has been widely used for quantifying microstructural changes in white matter maturation (e.g. Dubois et al., 2008; Mukherjee et al., 2001). Because of its sensitivity to organized cortical tissue (e.g. radial glial scaffold; Rakic, 1995; Sidman and Rakic, 1973) unique in the fetal and infant brain, dMRI also offers insights into maturation of cortical cytoarchitecture. Cortical fractional anisotropy (FA), a dMRI-derived measurement, of infant and fetal brain can effectively quantify local cortical microstructural architecture and can be used to infer specific brain circuit formation. In early cortical development, most of cortical neurons are generated in the ventricular and subventricular zone. These neurons migrate towards cortical surface along a radially arranged scaffolding of glial cells where relatively high FA values are usually observed (Huang et al., 2013; McKinstry et al., 2002). During emergence of brain circuits, increasing dendritic arborization (Bystron et al., 2008; Sidman and Rakic, 1973), synapses formation (Huttenlocher and Dabholkar, 1997), and myelination of intracortical axons (Yakovlev and Lecours, 1967) disrupt the highly organized radial glia in the immature cortex and result in cortical FA decreases. Such reproducible cortical FA change patterns were documented in many studies of perinatal human brain development (Ball et al., 2013; Huang et al., 2006; Huang et al., 2009; Huang et al., 2013; Kroenke et al., 2007; McKinstry et al., 2002; Neil et al., 1998; Ouyang et al., 2019a; Ouyang et al., 2019b; Yu et al., 2016), suggesting sensitivity of cortical FA measures to maturational processes of cortical microstructure. Diffusion-MRI-based regional cortical microstructure at birth, encoding rich

“footage” of regional cellular and molecular processes, may provide novel information regarding typical cortical development and biomarkers for neuropsychiatric disorders.

The first 2 years of life is a critical period for behavioral development, with brain development in this period most rapid across lifespan. In parallel to rapid maturation of cortical architecture and establishment of complex neuronal connections (Hüppi et al., 1998; Ouyang et al., 2019a; Pfefferbaum et al., 1994), babies learn to walk, talk, and build the core capacities for lifetime. Infant behaviors including cognition, language and motor emerge during this time and become measurable at around 2 years of age. Reliable diagnosis for many neuropsychiatric disorders, such as autism spectrum disorder (ASD), can be made only around 2 years of age or later (Marín, 2016), as diagnoses rely on observing behavioral problems which are difficult to recognize in early infancy (Arpi and Ferrari, 2013; Ozonoff et al., 2010). On the other hand, early intervention for ASD, especially before 2 years of age, has demonstrated significant impacts on improving outcomes (Rogers et al., 2014). Given that infants cannot communicate with language or writing in early infancy, there may be no better way to assess their brain development other than neuroimaging. Prediction of future cognition and behavior at 2 years of age or later based on brain features around birth creates an invaluable time window for individualized biomarker detection and early tailored intervention leading to better outcomes.

Individual differences in brain white matter microstructural architectures (Scholz et al., 2009; Yu et al., 2019), behavior, and functions (Braga and Buckner, 2017; Xu et al., 2019) have been well recognized. Individual variability in brain structures and associated individual variability in future behaviors can be harnessed for robust prediction at the single-subject level (Kanai and Rees, 2011; Rosenberg et al., 2018), a step further than group classification. A few studies have been conducted previously to investigate within-sample imaging-outcome correlations (Ball et al., 2015; Counsell et al., 2014; Deoni et al., 2016; Hintz et al., 2015; Keunen et al., 2017; Wee et al., 2017; Woodward et al., 2006), while such correlation approaches made it impossible to be applied to new and incoming subjects. Machine learning approach that can adopt new subjects and yield

continuous prediction values has been explored only recently based on white matter structural networks (Girault et al., 2019; Kawahara et al., 2017). Cortical microstructure quantified by FA is more directly associated with specific cortical regions and thus certain cortical functions, compared to association of structural networks to the cortical regions through end point connectivity. Our previous study (Ouyang et al., 2019b) demonstrated that cortical FA predicted neonate age with high accuracy. Regionally distinctive cortical microstructure around birth encodes the information that may predict distinctive functions manifested by future behavior and potentially identify the most sensitive regions as imaging markers to detect early behavioral abnormality. However, dMRI-based cortical microstructure has not been evaluated for predicting either discrete or continuous future behavioral measurement so far. And dMRI-based cortical microstructure has not been incorporated into a machine-learning-based prediction model for predicting future behavior, either.

In this study, we leveraged individual variability of cortical microstructure profiles of neonate brains for predicting future behavior. A novel machine-learning-based model using regional cortical microstructure markers from dMRI and capable of predicting continuous outcome values as well as incorporating new subjects was developed. We hypothesized that dMRI-based cortical microstructure at birth only (without inclusion of any white matter microstructure information) could robustly predict the future neurodevelopmental outcomes. Out of 107 recruited neonates, high-resolution ( $0.656 \times 0.656 \times 1.6 \text{ mm}^3$ ) dMRI data were acquired from 87 neonates, of which 46 underwent a follow-up study at their two years of age for neurobehavioral assessments of cognitive, language and motor abilities. Cortical microstructural architectures at birth were quantified by cortical FA on the cortical skeleton to alleviate partial volume effects (Ouyang et al., 2019b; Yu et al., 2016). Regional cortical FA measures were then used to form feature vectors to predict neurodevelopmental outcomes at 2 years of age. We further quantified the contribution of each cortical region in predicting different outcomes, as distinctive behaviors are likely encoded in uniquely distributed pattern across the cerebral cortex.

## Results

**Cortical microstructure at birth and neurodevelopmental outcomes at 2 years of age.** A cohort of 107 neonates were recruited for studying normal prenatal and perinatal human brain development (see more details in *Materials and methods* and Supplementary Table 1). Neuroimaging data, including structural and diffusion MRI, were collected from 87 infants around birth in their natural sleep. 46 infants went through a follow-up visit at their 2 years of age to complete the cognitive, language and motor assessments with Bayley scales of infant and toddler development-Third Edition (Bayley-III; Bayley, 2006). Supplementary Figures 1 and 2 demonstrate the cortical FA maps in the left and right hemisphere from dMRI of all these 46 subjects scanned at birth, revealing individual variability of regional cortical microstructure. The Bayley-III composite scores from these 46 subjects at 2 years of age range from 65 to 110 (mean $\pm$ sd: 87.4 $\pm$ 8.5) for cognition, 56 to 112 (85.7 $\pm$ 10.1) for language and 73 to 107 (91.2 $\pm$ 7.1) for motor abilities (Supplementary Fig. 3). No significant correlation between any specific age (i.e. birth age, MRI scan age and Bayley-III exam age) and neurodevelopmental outcome score was found (all  $p>0.1$ , Supplementary Table 2).

**Robust prediction of cognitive and language outcomes based on cortical dMRI measurement.** 52 cortical regions parcellated by transforming neonate atlas labels (Fig. 1, see *Materials and methods*) were used to generate cortical FA feature vectors from each participant's dMRI data at birth, representing the entire cortical microstructural architecture of an individual neonate. Heterogeneous distribution pattern of cortical FA can be appreciated from cortical FA maps (left panels of Fig. 1), indicating regionally differentiated maturation level of cortical microstructure. An immature cerebral cortical region with highly organized radial glia scaffold is associated with high FA values, whereas a more mature cortical region with extensive dendritic arborizations and synapses formations is associated with low FA values. To determine whether cortical microstructural features represented by FA measurements at birth are capable of

predicting neurodevelopmental outcomes of an individual infant at a later age, we used support vector regression (SVR) with a fully leave-one-out cross-validated (LOOCV) approach (*middle panels* of Fig. 1). With this approach, neurodevelopmental outcome of each infant was predicted from an independent training sample. That is, for each testing subject out of the 46 participants, the cortical FA features of remaining 45 subjects were used to train prediction models for predicting cognitive or language outcomes of the testing subject at 2 years of age (*right panels* of Fig. 1) only based on cortical FA of the testing subject at birth. A SVR model that best fits the training sample can be represented by a weighted contribution of all features, where the weight vector ( $\vec{w}$ ) indicates the relative contribution of each feature, namely, cortical FA of each parcellated cortical region, to the prediction model. The feature contribution weights in the model predicting cognition or language were averaged across all leave-one-out SVR models and then normalized. These normalized feature contribution weights were projected back onto the cortical surface to demonstrate cortical regional contribution (*right panels* of Fig. 1).

Significant correlations between predicted and actual neurodevelopmental outcome were found for both cognitive ( $r=0.536$ ,  $p=1.2 \times 10^{-4}$ ) and language ( $r=0.474$ ,  $p=8.8 \times 10^{-4}$ ) scores, respectively (left panel of Fig. 2a and Fig. 2b), indicating robust prediction of cognitive and language outcomes at 2 years old based on cortical FA measures at birth. According to the permutation tests, these correlations were significantly higher than those obtained by chance ( $p<0.005$ ). The mean absolute errors (MAE) between the predicted and actual scores are 5.49 and 7 for cognitive and language outcomes respectively. These MAEs were significantly lower than those obtained by chance ( $p<0.01$ ), based on permutation tests. The highly predictive models suggest that cortical microstructural architecture at birth plays an important role in predicting future behavioral and cognitive abilities. However, motor scores were not able to be predicted from cortical FA measures ( $r = 0.1$ ,  $p = 0.52$ ).

**Regionally heterogeneous contribution to the cognitive and language prediction.** Regional cortical FA measures across entire cortex did not contribute equally to the prediction models. Heterogeneous feature contribution pattern can be clearly seen across cortex for either cognitive (Fig. 2a) or language (Fig. 2b) prediction. For instance, from distribution of normalized feature contribution weights in cognitive prediction model (*center panel* of Fig. 2a), high contributions from right precuneus gyrus (PrCu) (indicated by black arrow) and bilateral rectus gyri (REC) (indicated by green arrows) are prominent, with bright red gyri associated with high feature contribution. To quantitatively demonstrate heterogeneous feature contribution of all cortical gyri, the normalized feature contribution weights from 52 cortical gyri categorized into 6 cortices are shown in a circular bar plot (*right panel* of Fig. 2a). Higher bar indicates higher feature contribution of a cortical region to the model. The normalized feature contribution weights of the frontal, parietal and limbic gyri (e.g. REC, postcentral and entorhinal gyri) are relatively higher than those of the occipital, temporal and insular cortex (e.g. superior temporal or occipital gyri) in cognitive prediction.

Similar to cognitive prediction, regional variations of feature contribution can be observed in language prediction model, as demonstrated in cortical surface map and circular bar plot in Fig. 2b. For example, higher feature contribution weight was found in the left postcentral gyrus (PoCG) (indicated by black arrow) than its counterpart in the right hemisphere. Feature contribution weights in the frontal and limbic gyri are also higher than those in the occipital and temporal gyri. Differential normalized feature contribution weights in cognitive or language prediction model across all cortical gyri are listed in Supplementary Table 3.

**Unique regional contribution to predicting cognitive or language outcomes.** Besides regionally heterogeneous contributions, unique feature contribution patterns were found in predicting cognitive or language outcomes. The top 10 cortical regions where microstructural measures contributed most to the prediction of cognitive and language scores are listed in Fig. 3a and mapped onto cortical surface in Fig. 3b. Among these top 10 cortical regions, left REC,



bilateral entorhinal gyrus (ENT), right middle/lateral fronto-orbital gyrus (MFOG/LFOG) and left PoCG are the common regions (highlighted in yellow in Fig. 3b) for predicting both cognitive and language outcomes. Right REC, right PrCu, right parahippocampal gyrus (PHG) and left fusiform gyrus (FuG) are unique to cognitive prediction (highlighted in red in Fig. 3b), and left inferior frontal gyrus (IFG), left cingular gyrus (CingG), left insular cortex (INS) and right angular gyrus (ANG) are unique to language prediction (highlighted in green in Fig. 3b). It is striking that left IFG, usually known as “Broca’s area” for language production, was uniquely found in the top contributing regions in language prediction model. Notably right PrCu, an important hub for default mode network, was uniquely found among the top contributing regions in cognitive prediction model. Bootstrapping analysis indicated that the top 10 cortical regions (Fig. 3) where microstructural measures contributing most to prediction were reproducible from 1000 bootstrap resamples for predicting each behavioral outcome (Supplementary Fig. 4). Highly unique regional contribution to predicting different outcomes (cognition or language) was quantified by a non-overlapping index, the statistical significance of which was confirmed with permutation tests. Details of bootstrapping analysis and permutation tests are elaborated in Supplementary Materials.

### **Comparison between prediction based on cortical FA and prediction based on white matter**

**FA.** Since dMRI has been conventionally used mainly for measuring white matter microstructure, we also evaluated the prediction performance when only using regional white matter FA measures as features (Fig. 4a). Both cognitive ( $r=0.516$ ,  $p=2.4 \times 10^{-4}$ ) and language ( $r=0.517$ ,  $p=2.3 \times 10^{-4}$ ) scores can be reliably predicted with white matter FA measures, indicated by significant correlations between predicted and actual scores (Fig. 4b). More importantly, solely cortical FA measures at birth is as robust as white matter FA measures in predicting the cognitive and language scores at 2 years of age, demonstrated by similar correlation coefficient values between the predicted and actual scores (Fig. 4c, *all* significant correlation with  $p < 0.05$ ).

**Evaluation of robustness of prediction models.** *Evaluation by categorizing subjects with normal and low scores.* As Bayley-III is widely used to assess developmental delay with certain cut-off scores, we also evaluated the performance of cortical microstructural measures in classifying subjects with normal and low scores. High accuracy was achieved with a receiver operating characteristic (ROC) curve analysis. Cognitive and language scores of each infant were categorized into normal ( $>85$ ,  $n = 22$  for cognitive scores and  $n = 24$  for language scores) and low ( $\leq 85$ ) scores groups. Cortical FA features were used to build classifiers with leave-one-out procedure to classify each infant into one of these two groups. The ROC curve analysis was used to test the ability of cortical FA measures at birth to distinguish infants with low 2-year-old outcomes from those with normal outcomes (Fig. 5a). Classification accuracy was 76.1% for cognitive and 60.9% for language scores (Fig. 5b). Our analysis revealed an area under curve (AUC) of 0.809 and 0.737 for cognitive and language classifications (Fig. 5c), respectively, further supporting the cortical microstructural architecture at birth as a sensitive marker for prediction and potential detection of early behavioral abnormality.

*Evaluation with different cortical parcellation schemes and age effects around birth.* The prediction models are robust based on evaluation results of different cortical parcellation schemes (128, 256, 512, and 1024 random cortical parcels) (Supplementary Fig. 5). Age adjustment in the cortical FA features does not affect significance of the prediction results (Supplementary Fig. 5). Details of these test results are elaborated in Supplementary Materials.

## Discussion

We leveraged individual variability in the cortical microstructural architecture at birth for a robust prediction of individualized future behavioral outcomes in continuous values. Cortical microstructure at birth, encoding rich “footage” of regional cellular and molecular processes in early human brain development, was evaluated as the baseline measurements for prediction. Our previous studies (Huang et al., 2009; Ouyang et al., 2019b; Yu et al., 2016) found that individual neonate cortical microstructure profile characterized by different levels of dendritic arborization could be reliably quantified with dMRI-based cortical FA that reveals cortical maturation signature. In this study, we further demonstrated that individual variability of cortical microstructure profile around birth can be used to robustly predict the cognitive and language outcomes of individual infant at 2 years of age. By harnessing different encoding patterns of cognitive and language functions across the entire cortex, we quantified unique contribution of each cortical region and highlighted the most sensitive regions for predicting different outcomes. Cortical regions contributing heavily to the prediction models exhibited distinctive functional selectivity for cognition and language. To our knowledge, this is the first study evaluating regional cortical microstructure for predicting future behavior, laying the foundation for future works using cortical microstructure profile as ‘neuromarkers’ to predict the risk of an individual developing health-related behavioral abnormalities (e.g. ASD). The prediction model is also capable of incorporating new and incoming subjects, a step further than previous within-sample imaging-outcome correlation studies (Ball et al., 2015; Counsell et al., 2014; Deoni et al., 2016; Hintz et al., 2015; Keunen et al., 2017; Wee et al., 2017; Woodward et al., 2006). If given a larger sample size, this study has the potential to change the paradigm of identifying infants at risk of neurodevelopmental disorders (e.g. ASD) at a time when infant is pre-symptomatic in behavioral assessments and intervention can lead to better outcomes.

With cerebral cortex playing a central role in human cognition and behaviors, high performance achieved in prediction of cognition and language based on cortical FA measures (Fig. 2) is probably due to sensitivity of cortical microstructural changes to maturational processes involving synaptic formation, dendritic arborization and axonal growth. Distinctive maturation processes manifested by differentiated cortical FA changes across cortical regions in fetal and infant brains were reproducibly reported development (Ball et al., 2013; Huang et al., 2006; Huang et al., 2009; Huang et al., 2013; Kroenke et al., 2007; McKinstry et al., 2002; Neil et al., 1998; Ouyang et al., 2019a; Ouyang et al., 2019b; Yu et al., 2016). Although cortical thickness, volume or surface area from structural MRI scans (i.e. T1- or T2-weighted images) were conventionally primary structural measurements to characterize infant cerebral cortex development (Hazlett et al., 2017; Hill et al., 2010; Lyall et al., 2015), they cannot characterize the complex microstructural processes that take place inside the cortical mantle. Compared to macrostructural changes quantified by these conventional measurements, the underlying microstructural processes quantified by cortical FA may be more sensitive to infants with pathology such as those with risk of ASD. Because white matter microstructure (e.g. FA) measurement is more widely used in dMRI studies than cortical microstructure measurement, we also evaluated white matter FA at birth for predicting cognitive and language outcome at 2 years of age (Fig. 4). Despite the fact that microstructural measures from solely cerebral cortex or white matter at birth have similar sensitivity in predicting neurodevelopment outcomes at 2 years old (Fig. 4), cortical microstructure is more directly associated with specific cortical regions and thus certain cortical functions, compared to association of white matter to the cortical regions through end point connectivity.

Human brain development in the first two years is most rapid across the lifespan. During first 2 years after birth, overall size of an infant brain increases dramatically, reaching close to 90% of an adult brain volume by 2 years of age (Pfefferbaum et al., 1994). Despite rapid development, infancy period (0-2 years) of human is probably the longest among all mammals

with cognitive and language functions unique in human emerging during this critical period. For instance, infants start to learn their mother tongue from babbling to full sentences, during age of 6-month to 2-3 years (Kuhl, 2004). This lengthy yet extremely dynamic brain development processes make the prediction of 2-year neurodevelopmental outcome with brain information at birth ultimately invaluable. DMRI-based cortical microstructure at birth, before any behavioral tests could be performed, can well predict both cognition and language outcomes at 2 years of age (Fig. 2). A regionally heterogeneous distribution pattern across cerebral cortex was displayed (Fig. 2). Furthermore, consistent to their functions documented in the literature, the cortical regions contributing heavily to the prediction models exhibited unique functional selectivity for cognition and language (Fig. 3 and Supplementary Fig. 4). The cognitive scale in Bayley-III estimates cognitive functions including object relatedness, memory, problem solving and manipulation on the basis of nonverbal activities (Bayley, 2006). Cortical regions with high weight in prediction model are tightly associated with cognitive functions. Right rectus, precuneus, parahippocampal and left fusiform gyri were among the top 10 cortical regions (painted red in Fig. 3b) where microstructural measures contributed uniquely to the cognition prediction, but not to language prediction. Parahippocampal gyrus provides poly-sensory input to the hippocampus (Witter et al., 2000) and holds an essential position for mediating memory function (Young et al., 1997). Precuneus is a pivotal hub essential in brain's default-mode network (Buckner et al., 2008) and involved in various higher-order cognitive functions (Cavanna and Trimble, 2006). Rectus and fusiform gyri are associated with higher-level social cognition processes (Viskontas et al., 2007). For regions contributing heavily to both cognition and language prediction and painted yellow in Fig. 3b, bilateral entorhinal gyri likely serve as a pivot junctional region mediating the processes of different types of sensory information during the cortex-hippocampus interplay (Witter et al., 2000). Middle and lateral fronto-orbital gyrus are involved in cognitive processes including learning, memory and decision-making (Wikenheiser and Schoenbaum, 2016). Left postcentral gyrus with high feature contribution weight in both prediction models is associated

with the general motor demands of performing tasks. Besides higher-order cognitive functions, language functions are also unique in human beings. The first two years of life is a critical and sensitive period for the speech-perception and speech-production development (Kuhl, 2004; Werker and Hensch, 2015). The language scale from Bayley-III includes two subdomains: receptive communication and expressive communication. Here, the term “communication” refers to any way that a child uses to interact with others, and includes communication in prelinguistic stage (e.g. eye gaze, gesture, facial expression, vocalizations, words), social-emotional skills and communication in more advanced stage of language emergence (Bayley, 2006). The distinctive regions with high feature contribution weights only in language prediction model included left inferior frontal gyrus (IFG), cingular gyrus, insular cortex and right angular gyrus, painted green in Fig. 3b. These regions are related to receptive and expressive communication. It is striking that left IFG, known as “Broca’s area”, was identified by this data-driven prediction model because it is well known that Broca’s area plays a pivotal role in producing language (Poeppel, 2014). Angular gyrus, another crucial language region in the parietal lobe, supports the integration of semantic information into context and transfers visually perceived words to Wernicke’s area. Left insula, a part of the articulatory network in the dual-stream model of speech processing, is involved in translating acoustic speech signals into articulatory representations in the frontal lobe (Hickok and Poeppel, 2007). Since Bayley language scale also includes a number of items reflecting social-emotional skills, such as how a child responds to his/her name or reacts when interrupted in play, high feature contribution weight of insular cortex may be due to its important role in social emotions (Lamm and Singer, 2010). High feature contribution weight of cingular cortex might be related to its key involvement in emotion and social behavior (Bush et al., 2000). Taken together, identifying these regions with highest feature contribution weights sheds light on understanding local brain structural basis underlying emergence of distinctive functions manifested by daily behavior, enhancing our knowledge of brain-behavior relationships.

Motor scores from Bayley-III were not predicted reliably in this study possibly due to low variability and low signal-to-noise ratio of cortical FA measurement in primary sensorimotor cortical regions associated with motor function. Cortical FA measurements at primary sensorimotor cortex are relatively low compared to those at other cortices (Ball et al., 2013; Ouyang et al., 2019b) and are barely above the noise floor, as primary sensorimotor cortex develops earlier compared to cortical regions associated with higher-order brain functions. Individual variability of cortical microstructure at primary sensorimotor cortex cannot be well captured with relatively low signal-to-noise ratio for the cortical FA measurements at these regions. High individual variability enables reliable prediction. Low functional variability at primary sensorimotor cortex was found in a largely overlapped cohort in a separate study (Xu et al., 2019) from our group, and was reproducibly found in another cohort (<http://developingconnectome.org>). With strict exclusion criteria of participating cohort around birth, higher average and lower variance of motor scores than those of cognition or language scores play an important role in poor prediction of motor scores. Larger group variability in motor scores and larger sample size can offset the limitations elaborated above and enhance the prediction of motor scores.

Technical considerations, limitations and future directions are discussed below. The capacity of cortical microstructural profile at birth to predict an individual infant's later behavior is substantial (Fig. 2). We trained models to classify the low and normal outcomes. The ROC curves and accuracy measurements in Fig. 5 demonstrated high accuracy of the classification models. Robustness of the prediction model was further tested against various factors. These factors included different cortical parcellation schemes (random and finer parcellations versus parcellation based on an atlas) for measuring feature vectors, and individual age adjustment (Supplementary Fig. 5). Importantly, high performance of the prediction models is reproducible after taking above-mentioned factors into consideration. Despite relatively high dMRI resolution ( $0.656 \times 0.656 \times 1.6 \text{ mm}^3$ ) being used, partial volume effects (Jeon et al., 2012) cannot be ignored

for measuring cortical FA. The partial volume effects are different across brain with thinner cortical regions more severely affected. To maximally alleviate the partial volume effects and enhance the measurement accuracy, we adopted a “cortical skeleton” approach (Ouyang et al., 2019b; Yu et al., 2016), demonstrated in the left panel of Fig. 1, to measure cortical microstructure at the center or “core” of the cortical plate. Although both preterm and term-born infants are included, none of them were clinically referred. All infants had been recruited solely for brain research and rigorously screened by a neonatologist and a pediatric neuroradiologist to exclude any infants with signs of brain injury (see *Materials and method* for more details). To limit the effects of exposure to the extrauterine environment, this study was designed to make the interval between birth and scan age as short as possible. As a result, we did not find any significant correlation between birth age or MRI scan age and neurodevelopmental outcomes (see Supplementary Table 2). The literature (Bonifacio et al., 2010) also indicated that the effects of premature birth on brain development are considered to be relatively trivial compared with the effects of brain injury and co-morbid condition which was not presented in any recruited infant due to strict exclusion criteria. Although we have taken many precautions to extract cortical FA measures and test internal validity of our prediction analysis, several limitations will need to be addressed in future research. Despite the fact that relatively high performance of behavioral prediction was achieved with current cohort of infants, the prediction model will benefit from validation (e.g. *k*-fold cross-validation) and replication with an independent infant cohort of a larger sample size for generalization. Thus, prediction model with individual variability representing a general population from a much larger cohort is warranted in future research. Future research will also benefit from incorporating other markers such as functional neuroimaging, multimodal imaging and genetic factors (e.g. Kwon et al., 2014; Smyser et al., 2016) as well as adopting more advanced machine learning algorithms such as multi-kernel and deep learning to further improve prediction. This study included a healthy cohort of infants for evaluating cortical microstructure for predicting future behavior. Such evaluation in the setting of pathology needs to be further validated. The observed



neurodevelopmental outcomes were also contributed by unmeasured factors such as maternal age and tertiary educational level as well as other home environment variable following discharge from the hospital, all of which should be taken into consideration in the future prediction model.

In conclusion, whole-brain cortical FA at birth, encoding rich information of dendritic arborization and synaptic formation, could be reliably used for predicting neurodevelopmental outcomes of 2-years-old infants by leveraging individual variability of these measures. Feature contribution weight in cognitive or language prediction is heterogeneous across brain regions. The cortical regions contributing heavily to the prediction models exhibited unique functional selectivity for cognition and language. Identifying regions with highest feature contribution weights offers preliminary findings on understanding local brain microstructural basis underlying emergence of future behavior, enhancing our knowledge of brain-behavior relationships. These findings also suggest that cortical microstructural information at birth may be potentially used for prediction of behavioral abnormality in infants with high risk for brain disorders early at a time when infant is pre-symptomatic in behavioral assessments and intervention may be most effective.

## Materials and methods

**Participants.** The study was approved by the Institutional Review Board (IRB) at the University of Texas Southwestern Medical Center. 107 neonates were recruited from the Parkland Hospital and scanned at Children's Medical Center at Dallas. Evaluable MRI was obtained from 87 neonates (58 M/ 29 F; post-menstrual ages at scan: 31.9 to 41.7 postmenstrual weeks (PMW); post-menstrual ages at birth: 26 to 41.4 PMW). All recruited infants were not clinically indicated, and they were recruited completely for research purpose which was studying the normal prenatal and perinatal human brain development. These neonates were selected through rigorous screening procedures by a board-certified neonatologist (LC) and an experienced pediatric radiologist, based on subjects' ultrasound, clinical MRI and medical record of the subjects and mothers. The exclusion criteria included evidence of bleeding or intracranial abnormality by serial sonography; the mother's excessive drug or alcohol abuse during pregnancy; periventricular leukomalacia; hypoxic–ischemic encephalopathy; Grade III–IV intraventricular hemorrhage; body or heart malformations; chromosomal abnormalities, lung disease or bronchopulmonary dysplasia; necrotizing enterocolitis requiring intestinal resection or complex feeding/nutritional disorders; defects or anomalies of the brain; brain tissue dysplasia or hypoplasia; abnormal meninges; alterations in the pial or ventricular surface; or white matter lesions. Informed parental consents were obtained from the subject's parent. More demographic information of the participants can be found in Supplementary Table 1.

**Measurement of cortical microstructure with brain MRI at birth.** All neonates were scanned with a 3T Philips Achieva System (ages at scan: 31.9 to 41.7 PMW). Neonates were fed before the MRI scan and wrapped with a vacuum immobilizer to minimize motion. During scan, all neonates were asleep naturally without sedation. Earplugs, earphones and extra foam padding were applied to reduce the sound of the scanner. All 87 neonates underwent high-resolution diffusion MRI and structural MRI scans. A single-shot echo-planar imaging (EPI) sequence with

Sensitivity Encoding parallel imaging (SENSE factor = 2.5) was used for dMRI. Other dMRI imaging parameters were as follows: time of repetition (TR) = 6850ms, echo time (TE) = 78ms, in-plane field of view = 168x168 mm<sup>2</sup>, in-plane imaging matrix = 112x112 reconstructed to 256x256 with zero filling, in-plane resolution = 0.656x0.656 mm<sup>2</sup> (nominal imaging resolution 1.5x1.5 mm<sup>2</sup>), slice thickness = 1.6mm without gap, slice number = 60, and 30 independent diffusion encoding directions with b value = 1000s/mm<sup>2</sup>. Two repetitions were conducted for dMRI acquisition to improve the signal to noise ratio (SNR), resulting in a scan time of 11 minutes. Diffusion tensor of each brain voxel was calculated with routine tensor fitting procedures as described in details in the Supplementary Methods.

DTI-derived fractional anisotropy (FA) maps were used to obtain the cortical skeleton FA measurements at specific cortical gyral regions of interests identified by certain gyral label from a neonate atlas (Feng et al., 2019). To alleviate partial volume effects, the cortical FA values were measured on the cortical skeleton, i.e. the center of the cortical mantle, demonstrated as green skeletons in the left panels of Fig. 1. This procedure was elaborated in our previous studies (Ouyang et al., 2019b; Yu et al., 2016). The cortical skeleton was created from averaged FA maps in three age-specific templates at 33, 36 and 39PMW due to dramatic anatomical changes of the neonate brain from 31.9 to 41.7 PMW. Based on the scan age, individual subject brain was categorized into 3 age groups at 33, 36 and 39PMW, and registered to the corresponding templates using the registration protocol described in details in the literature (Feng et al., 2019; Oishi et al., 2011). By applying the skeletonization function in *TBSS* of *FSL* (<http://fsl.fmrib.ox.ac.uk/fsl/fslwiki/TBSS>), cortical skeleton of the 33PMW or 36PMW brain was extracted from the averaged cortical FA map and cortical skeleton of the 39PMW brain was obtained with averaged cortical segmentation map due to low cortical FA in 39PMW brains. The cortical skeleton in the 33, 36 and 39PMW space was then inversely transferred to each subject's native space, to which the 52 cortical gyral labels of a neonate atlas (Feng et al., 2019) were also

mapped to parcellate the cortex (Fig. 1). By directly overlapping the cortical skeleton with the neonate atlas, the cortical skeleton was parcellated into 52 gyri. The FA measurement at each cortical gyrus was calculated by averaging the measurements on the cortical skeleton voxels with this cortical label. In this way, feature vectors consisting cortical FA values from 52 parcellated cortical gyri and measured at the cortical skeleton were obtained for the following support vector regression (SVR) procedures.

**Neurodevelopmental assessments at 2 years of age.** Out of 87 neonates with evaluable MRI scanned around birth, a follow-up neurodevelopmental assessment was obtained from 46 neonates (32M/14F, scan age of  $36.7 \pm 2.8$  PMW) at their 2 years of age (20-29 months,  $23.5 \pm 2.3$  months) corrected for prematurity, with gestational age taken into account. Cognitive, language and motor development were assessed using the Bayley-III (Bayley, 2006). Specifically, the cognitive scale estimates general cognitive functioning on the basis of nonverbal activities (i.e. object relatedness, memory, problem solving, and manipulation); the language scale estimates receptive communication (i.e. verbal understanding and concept development) as well as expressive communication including the ability to communicate through words and gestures; and the motor scale estimates both fine motor (i.e. grasping, perceptual-motor integration, motor planning and speed) and gross motor (i.e. sitting, standing, locomotion and balance) (Bayley, 2006). The Bayley-III is age standardized and widely used in both research and clinical settings. It has published norms with a mean (standard deviation) of 100 (15), with higher scores indicating better performance. This neurodevelopmental assessment was conducted by a certified neurodevelopmental psychologist, who was blinded to clinical details of infants as well as the neonate MR findings. Unlike cognitive, language and motor scales reliably obtained using items administered to the child by a certified neurodevelopmental psychologist, other two scales from Bayley-III (social-emotional and adaptive scales) obtained from primary caregiver heterogeneous responses to questionnaires were not included in this study.

**Prediction of neurodevelopmental outcome.** To determine whether cortical FA at birth could serve as a biomarker for individualized prediction of neurodevelopmental outcomes at 2 years of age, we performed pattern analysis using SVR algorithm implemented in *LIBSVM* (Chang and Lin, 2011). SVR is a supervised learning technique based on the concept of support vector machine (SVM) to predict continuous variables such as cognitive, language or motor composite score from Bayley-III. Leave-one-out cross-validation (LOOCV) was adopted to evaluate performance of the SVR model for each score. Cortical FA at birth from one individual subject was used as the testing data and the information of remaining 45 subjects including their cortical FA at birth and Bayley scores at 2 years of age were used as training data. In this procedure, the neurodevelopmental outcome of each infant was predicted from an independent training sample. Cortical FA measurements from 52 parcellated cortical gyri formed the feature vectors of each subject and were used as the SVR predictor. Feature vectors for all subjects were concatenated (*Feature vectors* in Fig. 1) to obtain the input data for SVR prediction models with linear kernel function (Fig. 1). Each feature represented by FA measurement at each cortical gyrus was independently normalized across training data. Only training data was used to compute the normalization scaling parameters, which were then applied to the testing data. After predicted continuous cognitive or language scores were estimated by the prediction model, Pearson correlation and mean absolute error (MAE) between the actual and predicted continuous score were computed to evaluate cognition or language prediction models. The normalized feature contribution weights ( $|w_i|/\sum |w_i|$  with  $i$  indicating  $i$ th cortical gyrus) were calculated to represent contribution of all parcellated cortical gyri to the cognition or language prediction model. These normalized feature contribution weights of all parcellated cortical gyri in cognition or language prediction model were then mapped to the cortical surface to reveal heterogeneous regional contribution across entire cortex and unique regional contribution distribution in a specific prediction model.

**Permutation test of LOOCV prediction performance.** Permutation test was conducted to assess LOOCV prediction performance. Specifically, cognitive or language outcomes were randomly shuffled across subjects 1000 times. Prediction procedure was carried out with each set of randomized outcomes, generating null distributions. Pearson correlation was conducted for each set of randomized outcome. MAE between predicted and observed (randomly shuffled) outcome was also calculated. The  $p$  values of correlation coefficient ( $r$ ) value in LOOCV prediction, calculated as the ratio of number of permutation tests with  $r$  value greater than observed  $r$  value over number of all permutation tests, are the probability of observing the reported  $r$  values by chance. Similarly, the  $p$  values of MAE in LOOCV prediction, calculated as the ratio of number of permutation tests with MAE value lower than observed MAE value over number of all permutation tests, are the probability of observing the reported MAE by chance.

**Additional evaluation of prediction model.** White matter microstructure quantified with dMRI was tested for predicting neurodevelopmental outcomes. White matter skeleton FA values at the core were measured to alleviate the partial volume effects (Fig. 4a). White matter skeleton was further parcellated into 40 tracts with the tract labeling transformed from a neonate atlas (Feng et al., 2019). Details of tract-wise FA measurement at the white matter skeleton were described in our previous publication (Huang et al., 2012). White matter FA measurements of the 40 tracts were used to generate the feature vectors of each subject. Similar to the procedures of predicting neurodevelopmental outcomes with cortical FA feature vectors, these white matter FA feature vectors were the input of the SVR predictor with LOOCV for predicting neurodevelopmental outcome. To validate the capability of cortical FA in behavioral predictions, individual's Bayley composite scores were categorized into normal ( $>85$ ) and low scores ( $\leq 85$ ). Cortical FA measures were used as features to classify each subject's score into normal- or low-score groups using SVM algorithm with LOOCV. Classification accuracy and area under the receiver operating characteristic (ROC) curves were used to evaluate the performance of classification models.

## References

- Arpi, E. & Ferrari, F. (2013). Preterm birth and behaviour problems in infants and preschool-age children: a review of the recent literature. *Dev. Med. Child Neurol.* **55(9)**, 788-796. DOI: <https://doi.org/10.1111/dmcn.12142>
- Ball, G., Pazderova, L., Chew, A., Tusor, N., Merchant, N., Arichi, T., Allsop, J.M., Cowan, F.M., Edwards, A.D. & Counsell, S.J. (2015). Thalamocortical connectivity predicts cognition in children born preterm. *Cereb. Cortex.* **25(11)**, 4310-4318. DOI: <https://doi.org/10.1093/cercor/bhu331>
- Ball, G., Srinivasan, L., Aljabar, P., Counsell, S.J., Durighel, G., Hajnal, J.V., Rutherford, M.A. & Edwards, A.D. (2013). Development of cortical microstructure in the preterm human brain. *Proc. Natl Acad. Sci. USA* **110(23)**, 9541-9546. DOI: <https://doi.org/10.1073/pnas.1301652110>
- Bayley, N. BSID-III: Bayley Scales of Infant Development. (TX: Harcourt Assessment, San Antonio, 2006).
- Bonifacio, S.L., Glass, H. C., Chau, V., Berman, J. I., Xu, D., Brant, R., Barkovich, A.J., Poskitt, K.J., Miller, S.P. & Ferriero, D. M. (2010). Extreme premature birth is not associated with impaired development of brain microstructure. *J. Pediatr.* **157(5)**, 726-732. DOI: <https://doi.org/10.1016/j.jpeds.2010.05.026>
- Braga, R.M. & Buckner, R.L. (2017). Parallel interdigitated distributed networks within the individual estimated by intrinsic functional connectivity. *Neuron* **95(2)**, 457-471. DOI: <https://doi.org/10.1016/j.neuron.2017.06.038>
- Buckner, R. L., Andrews-Hanna, J. R., & Schacter, D. L. (2008). The brain's default network: Anatomy, function, and relevance to disease. In A. Kingstone & M. B. Miller (Eds.), *Annals of the New York Academy of Sciences: Vol. 1124. The year in cognitive neuroscience 2008* (p. 1–38). Blackwell Publishing.
- Bush, G., Luu, P. & Posner, M.I. (2000). Cognitive and emotional influences in anterior cingulate cortex. *Trends. Cogn. Sci.* **4(6)**, 215-222. DOI: [https://doi.org/10.1016/S1364-6613\(00\)01483-2](https://doi.org/10.1016/S1364-6613(00)01483-2)
- Bystron, I., Blakemore, C. & Rakic, P. (2008). Development of the human cerebral cortex: Boulder Committee revisited. *Nat. Rev. Neurosci.* **9**, 110-122. DOI: <https://doi.org/10.1038/nrn2252>
- Cavanna, A.E. & Trimble, M.R. (2006). The precuneus: a review of its functional anatomy and behavioural correlates. *Brain.* **129(3)**, 564-583. DOI: <https://doi.org/10.1093/brain/awl004>
- Chang, C.C. & Lin, C.J. (2011). LIBSVM: A library for support vector machines. *ACM. Trans. Intell. Syst. Technol.* **2(3)**, 27. DOI: <https://doi.org/10.1145/1961189.1961199>
- Counsell, S.J., Ball, G. & Edwards, A.D. (2014). New imaging approaches to evaluate newborn brain injury and their role in predicting developmental disorders. *Curr. Opin. Neurol.* **27(2)**, 168-175. DOI: <https://doi.org/10.1097/WCO.0000000000000073>
- Deoni, S.C., O'Muircheartaigh, J., Ellison, J.T., Walker, L., Doernberg, E., Waskiewicz, N., Dirks, H., Piryatinsky, I., Dean, D.C. & Jerns, N.L. (2016). White matter maturation profiles through early childhood predict general cognitive ability. *Brain Struct. Funct.* **221(2)**, 1189-1203. DOI: <https://doi.org/10.1007/s00429-014-0947-x>



- Dubois, J., Dehaene - Lambert, G., Perrin, M., Mangin, J. F., Cointepas, Y., Duchesnay, E., Le Bihan, D., & Hertz - Pannier, L. (2008). Asynchrony of the early maturation of white matter bundles in healthy infants: quantitative landmarks revealed noninvasively by diffusion tensor imaging. *Hum. Brain Mapp.* **29**(1), 14-27. DOI: <https://doi.org/10.1002/hbm.20363>
- Feng, L., Li, H., Oishi, K., Mishra, V., Song, L., Peng, Q., Ouyang, M., Wang, J., Slinger, M., Jeon, T., Lee, L., Heyne, R., Chalak, L., Peng, Y., Liu, S. & Huang, H. (2019). Age-specific gray and white matter DTI atlas for human brain at 33, 36 and 39 postmenstrual weeks. *NeuroImage* **185**, 685-698. DOI: <https://doi.org/10.1016/j.neuroimage.2018.06.069>
- Girault, J.B., Munsell, B. C., Puechmaile, D., Goldman, B. D., Prieto, J. C., Styner, M., & Gilmore, J. H. (2019). White matter connectomes at birth accurately predict cognitive abilities at age 2. *NeuroImage* **192**, 145-155. DOI: <https://doi.org/10.1016/j.neuroimage.2019.02.060>
- Hazlett, H.C., Gu, H., Munsell, B. C., et al. (2017). Early brain development in infants at high risk for autism spectrum disorder. *Nature*, **542**(7641), 348-351. DOI: <https://doi.org/10.1038/nature21369>
- Hickok, G. & Poeppel, D. (2007). The cortical organization of speech processing. *Nat. Rev. Neurosci.* **8**(5), 393-402. DOI: <https://doi.org/10.1038/nrn2113>
- Hill, J., Dierker, D., Neil, J., Inder, T., Knutsen, A., Harwell, J., Coalson, T. & Van Essen, D. (2010). A surface-based analysis of hemispheric asymmetries and folding of cerebral cortex in term-born human infants. *J. Neurosci.* **30**(6), 2268-2276. DOI: <https://doi.org/10.1523/JNEUROSCI.4682-09.2010>
- Hintz, S.R., Barnes, P. D., Bulas, D., Slovis, T. L., Finer, N. N., Wragge, L. A., ... & Walsh, M. C. (2015). Neuroimaging and neurodevelopmental outcome in extremely preterm infants. *Pediatrics*, **135**(1), e32-e42. DOI: <https://doi.org/10.1542/peds.2014-0898>
- Huang, H., Fan, X., Weiner, M., Martin-Cook, K., Xiao, G., Davis, J., Devous, M., Rosenberg, R. & Diaz-Arrastia, R. (2012). Distinctive disruption patterns of white matter tracts in Alzheimer's disease with full diffusion tensor characterization. *Neurobiol. Aging*. **33**(9), 2029-2045. DOI: <https://doi.org/10.1016/j.neurobiolaging.2011.06.027>
- Huang, H., Jeon, T., Sedmak, G., Pletikos, M., Vasung, L., Xu, X., Yarowsky, P., Richards, L.J., Kostović, I., Šestan, N. & Mori, S. (2013). Coupling diffusion imaging with histological and gene expression analysis to examine the dynamics of cortical areas across the fetal period of human brain development. *Cereb. Cortex*. **23**(11), 2620-2631. DOI: <https://doi.org/10.1093/cercor/bhs241>
- Huang, H., Xue, R., Zhang, J., Ren, T., Richards, L. J., Yarowsky, P., Miller, M. I., & Mori, S. (2009). Anatomical characterization of human fetal brain development with diffusion tensor magnetic resonance imaging. *J. Neurosci.* **29**, 4263-4273. DOI: <https://doi.org/10.1523/JNEUROSCI.2769-08.2009>
- Huang, H., Zhang, J., Wakana, S., Zhang, W., Ren, T., Richards, L. J., Yarowsky, P., Donohue, P., Graham, E., van Zijl P.C.M., & Mori, S. (2006). White and gray matter development in human fetal, newborn and pediatric brains. *NeuroImage* **33**(1), 27-38. DOI: <https://doi.org/10.1016/j.neuroimage.2006.06.009>
- Hüppi, P.S. Maier, S. E., Peled, S., Zientara, G. P., Barnes, P. D., Jolesz, F. A., & Volpe, J. J. (1998). Microstructural development of human newborn cerebral white matter assessed in



- vivo by diffusion tensor magnetic resonance imaging. *Pediatr. Res.* **44(4)**, 584-590. DOI: <https://doi.org/10.1203/00006450-199810000-00019>
- Huttenlocher, P.R. & Dabholkar, A.S. (1997). Regional differences in synaptogenesis in human cerebral cortex. *J. Comp. Neurol.* **387**, 167-178. DOI: [https://doi.org/10.1002/\(SICI\)1096-9861\(19971020\)387:2<167::AID-CNE1>3.0.CO;2-Z](https://doi.org/10.1002/(SICI)1096-9861(19971020)387:2<167::AID-CNE1>3.0.CO;2-Z)
- Innocenti, G.M. & Price, D.J. (2005). Exuberance in the development of cortical networks. *Nat. Rev. Neurosci.* **6(12)**, 955-965. DOI: <https://doi.org/10.1038/nrn1790>
- Jeon, T., Mishra, V., Uh, J., Weiner, M., Hatanpaa, K. J., White III, C. L., Zhao, Y.D., Lu, H., Diaz-Arraya, R. & Huang, H. (2012). Regional changes of cortical mean diffusivities with aging after correction of partial volume effects. *Neuroimage* **62(3)**, 1705-1716. DOI: <https://doi.org/10.1016/j.neuroimage.2012.05.082>
- Kanai, R. & Rees, G. (2011). The structural basis of inter-individual differences in human behaviour and cognition. *Nat. Rev. Neurosci.* **12(4)**, 231-242. DOI: <https://doi.org/10.1038/nrn3000>
- Kawahara, J., Brown, C. J., Miller, S. P., Booth, B. G., Chau, V., Grunau, R. E., Zwicker, J.G. & Hamarneh, G. (2017). BrainNetCNN: convolutional neural networks for brain networks; towards predicting neurodevelopment. *NeuroImage* **146**, 1038-1049. DOI: <https://doi.org/10.1016/j.neuroimage.2016.09.046>
- Keunen, K., Benders, M.J., Leemans, A., Fieret - Van Stam, P.C., Scholtens, L.H., Viergever, M.A., Kahn, R.S., Groenendaal, F., de Vries, L.S. & Van den Heuvel, M.P. (2017). White matter maturation in the neonatal brain is predictive of school age cognitive capacities in children born very preterm. *Dev. Med. Child Neurol.* **59(9)**, 939-946. DOI: <https://doi.org/10.1111/dmcn.13487>
- Kroenke, C. D., Van Essen, D. C., Inder, T. E., Rees, S., Bretthorst, G. L., & Neil, J. J. (2007). Microstructural changes of the baboon cerebral cortex during gestational development reflected in magnetic resonance imaging diffusion anisotropy. *J. Neurosci.* **27(46)**, 12506-12515. DOI: <https://doi.org/10.1523/JNEUROSCI.3063-07.2007>
- Kuhl, P.K. (2004). Early language acquisition: cracking the speech code. *Nat. Rev. Neurosci.* **5(11)**, 831-843. DOI: <https://doi.org/10.1038/nrn1533>
- Kwon, S.H., Vasung, L., Ment, L.R. & Huppi, P.S. (2014). The role of neuroimaging in predicting neurodevelopmental outcomes of preterm neonates. *Clin. Perinatol.* **41(1)**, 257-283. DOI: <https://doi.org/10.1016/j.clp.2013.10.003>
- Lamm, C. & Singer, T. (2010). The role of anterior insular cortex in social emotions. *Brain Struct. Funct.* **214(5-6)**, 579-591. DOI: <https://doi.org/10.1007/s00429-010-0251-3>
- Lyll, A.E., Shi, F., Geng, X., Woolson, S., Li, G., Wang, L., Hamer, R.M., Shen, D. & Gilmore, J. H. (2015). Dynamic development of regional cortical thickness and surface area in early childhood. *Cereb. Cortex.* **25(8)**, 2204-2212. DOI: <https://doi.org/10.1093/cercor/bhu027>
- Oishi, K., Mori, S., Donohue, P.K., Ernst, T., Anderson, L., Buchthal, S., Faria, A., Jiang, H., Li, X., Miller, M.I., van Zijl, P.C. & Chang, L. (2011). Multi-contrast human neonatal brain atlas: application to normal neonate development analysis. *NeuroImage* **56(1)**, 8-20. DOI: <https://doi.org/10.1016/j.neuroimage.2011.01.051>

- Ouyang, M., Dubois, J., Yu, Q., Mukherjee, P. & Huang, H. (2019a). Delineation of early brain development from fetuses to infants with diffusion MRI and beyond. *NeuroImage* **185**, 836-850. DOI: <https://doi.org/10.1016/j.neuroimage.2018.04.017>
- Ouyang, M., Jeon, T., Sotiras, A., Peng, Q., Mishra, V., Halovanic, C., Chen, M., Chalak, L., Rollins, N., Roberts, T.P., Davatzikos, C. & Huang, H. (2019b). Differential cortical microstructural maturation in the preterm human brain with diffusion kurtosis and tensor imaging. *Proc. Natl Acad. Sci. USA* **116(10)**, 4681-4688. DOI: <https://doi.org/10.1073/pnas.1812156116>
- Ozonoff, S. Iosif, A. M., Baguio, F., Cook, I. C., Hill, M. M., Hutman, T., Rogers, S.J., Rozga, A., Sangha, S., Sigman, M., Steinfeld, M. B. & Young, G.S. (2010). A prospective study of the emergence of early behavioral signs of autism. *J. Am. Acad. Child Adolesc. Psychiatry* **49(3)**, 256-266. DOI: <https://doi.org/10.1016/j.jaac.2009.11.009>
- Pfefferbaum, A. Mathalon, D. H., Sullivan, E. V., Rawles, J. M., Zipursky, R. B., & Lim, K. O. (1994). A quantitative magnetic resonance imaging study of changes in brain morphology from infancy to late adulthood. *Arch. Neurol.* **51(9)**, 874-887. DOI: <https://doi.org/10.1001/archneur.1994.00540210046012>
- Poeppel, D. (2014). The neuroanatomic and neurophysiological infrastructure for speech and language. *Curr. Opin. Neurobiol.* **28**, 142-149. DOI: <https://doi.org/10.1016/j.conb.2014.07.005>
- Marín, O. (2016). Developmental timing and critical windows for the treatment of psychiatric disorders. *Nat. Med.* **22(11)**, 1229-1238. DOI: <https://doi.org/10.1038/nm.4225>
- McKinstry, R.C., Mathur, A., Miller, J. H., Ozcan, A., Snyder, A. Z., Schefft, G. L., Almli, C. R., Shiran, S. I., Conturo, T. E., & Neil, J. J. (2002). Radial organization of developing preterm human cerebral cortex revealed by non-invasive water diffusion anisotropy MRI. *Cereb. Cortex.* **12(12)**, 1237-1243. DOI: <https://doi.org/10.1093/cercor/12.12.1237>
- Mukherjee, P., Miller, J. H., Shimony, J. S., Conturo, T. E., Lee, B. C., Almli, C. R., & McKinstry, R. C. (2001). Normal brain maturation during childhood: developmental trends characterized with diffusion-tensor MR imaging. *Radiology*, **221(2)**, 349-358. DOI: <https://doi.org/10.1148/radiol.2212001702>
- Neil, J.J., Shiran, S. I., McKinstry, R. C., Schefft, G. L., Snyder, A. Z., Almli, C. R., Akbudak, E., Aronovitz, J.A., Miller, J.P., Lee, B.C. & Conturo, T. E. (1998). Normal brain in human newborns: apparent diffusion coefficient and diffusion anisotropy measured by using diffusion tensor MR imaging. *Radiology* **209(1)**, 57-66. DOI: <https://doi.org/10.1148/radiology.209.1.9769812>
- Rakic, P. (1995). Radial versus tangential migration of neuronal clones in the developing cerebral cortex. *Proc. Natl. Acad. Sci. USA* **92**, 11323-11327. DOI: <https://doi.org/10.1073/pnas.92.25.11323>
- Rogers, S.J., Vismara, L., Wagner, A. L., McCormick, C., Young, G., & Ozonoff, S. (2014). Autism treatment in the first year of life: a pilot study of infant start, a parent-implemented intervention for symptomatic infants. *J. Autism Dev. Disord.* **44(12)**, 2981-2995. DOI: <https://doi.org/10.1007/s10803-014-2202-y>
- Rosenberg, M.D., Casey, B.J. & Holmes, A.J. (2018). Prediction complements explanation in understanding the developing brain. *Nat. Commun.* **9(1)**, 589. DOI: <https://doi.org/10.1038/s41467-018-02887-9>

- Scholz, J., Tomassini, V. & Johansen-Berg, H. Individual differences in white matter microstructure in the healthy brain. in Diffusion MRI (eds Johansen-Berg, H. & Behrens, T.E.J.) 237–250 (Academic Press, London, 2009). DOI: <https://doi.org/10.1016/B978-0-12-396460-1.00014-7>
- Sidman, R.L. & Rakic, P. (1973). Neuronal migration, with special reference to developing human brain: a review. *Brain Res.* **62**, 1-35. DOI: [https://doi.org/10.1016/0006-8993\(73\)90617-3](https://doi.org/10.1016/0006-8993(73)90617-3)
- Silbereis, J.C., Pochareddy, S., Zhu, Y., Li, M. & Sestan, N. (2016). The cellular and molecular landscapes of the developing human central nervous system. *Neuron* **89**, 248-268. DOI: <https://doi.org/10.1016/j.neuron.2015.12.008>
- Smyser, C.D., Dosenbach, N. U., Smyser, T. A., Snyder, A. Z., Rogers, C. E., Inder, T. E., Schlaggar, B.L. & Neil, J. J. (2016). Prediction of brain maturity in infants using machine-learning algorithms. *NeuroImage* **136**, 1-9. DOI: <https://doi.org/10.1016/j.neuroimage.2016.05.029>
- Viskontas, I.V., Possin, K.L. & Miller, B.L. (2007). Symptoms of frontotemporal dementia provide insights into orbitofrontal cortex function and social behavior. *Ann. N.Y. Acad. Sci.* **1121(1)**, 528-545. DOI: <https://doi.org/10.1196/annals.1401.025>
- Wee, C.Y. Tuan, T.A., Broekman, B.F., Ong, M.Y., Chong, Y.S., Kwek, K., Shek, L.P.C., Saw, S.M., Gluckman, P.D., Fortier, M.V., Meaney, M.J. & Qiu, A. (2017). Neonatal neural networks predict children behavioral profiles later in life. *Hum. Brain Mapp.* **38(3)**, 1362-1373. DOI: <https://doi.org/10.1002/hbm.23459>
- Werker, J.F. & Hensch, T.K. (2015). Critical periods in speech perception: new directions. *Ann. Rev. Psychol.* **66**, 173-196. DOI: <https://doi.org/10.1146/annurev-psych-010814-015104>
- Wikenheiser, A.M. & Schoenbaum, G. (2016). Over the river, through the woods: cognitive maps in the hippocampus and orbitofrontal cortex. *Nat. Rev. Neurosci.* **17(8)**, 513-523. DOI: <https://doi.org/10.1038/nrn.2016.56>
- Witter, M.P., Wouterlood, F.G., Naber, P.A. & Van Haeften, T. (2000). Anatomical organization of the parahippocampal - hippocampal network. *Ann. N.Y. Acad. Sci.* **911(1)**, 1-24. DOI: <https://doi.org/10.1111/j.1749-6632.2000.tb06716.x>
- Woodward, L.J., Anderson, P.J., Austin, N.C., Howard, K. & Inder, T.E. (2006). Neonatal MRI to predict neurodevelopmental outcomes in preterm infants. *N. Engl. J. Med.* **355(7)**, 685-694. DOI: <https://doi.org/10.1056/NEJMoa053792>
- Xu, Y., Cao, M., Liao, X., Xia, M., Wang, X., Jeon, T., Ouyang, M., Chalak, L., Rollins, N., Huang, H. & He, Y., (2019). Development and emergence of individual variability in the functional connectivity architecture of the preterm human brain. *Cereb. Cortex.* **29(10)**, 4208-4222. DOI: <https://doi.org/10.1093/cercor/bhy302>
- Yakovlev, P.I. & Lecours, A.R. The myelogenetic cycles of regional maturation of the brain. in *Regional Development of the Brain in Early Life* (ed Minkowski, A.) 3-70 (Oxford: Blackwell Science, 1967)
- Young, B.J., Otto, T., Fox, G.D. & Eichenbaum, H. (1997). Memory representation within the parahippocampal region. *J. Neurosci.* **17(13)**, 5183-5195. DOI: <https://doi.org/10.1523/JNEUROSCI.17-13-05183.1997>

- Yu, Q., Ouyang, A., Chalak, L., Jeon, T., Chia, J., Mishra, V., Sivarajan, M., Jackson, G., Rollins, N., Liu, S. & Huang, H. (2016). Structural development of human fetal and preterm brain cortical plate based on population-averaged templates. *Cereb. Cortex.* **26(11)**, 4381-4391. DOI: <https://doi.org/10.1093/cercor/bhv201>
- Yu, Q., Peng, Y., Kang, H., Peng, Q., Ouyang, M., Slinger, M., Hu, D., Shou, H., Fang, F. & Huang, H. (2019). Differential white matter maturation from birth to 8 years of age. *Cereb. Cortex.* Epub ahead of print at DOI: <http://doi.org/10.1093/cercor/bhz268>

## **Acknowledgements**

This study is sponsored by NIH R01MH092535, R01MH092535-S1 and U54HD086984. We would like to thank Brittany C. Bennett at the Children's Hospital of Philadelphia for her contribution to the schematic depiction.

## **Author contributions**

M.O. and H.H. designed the research; M.O., Q.P., T.J., R.H., L.C. and H.H. performed the research; M.O., P.Q., T.J. and H.H. analyzed the data; and M.O. and H.H. wrote the paper.

**Competing interests:** The authors declare no competing interests.

## Figures

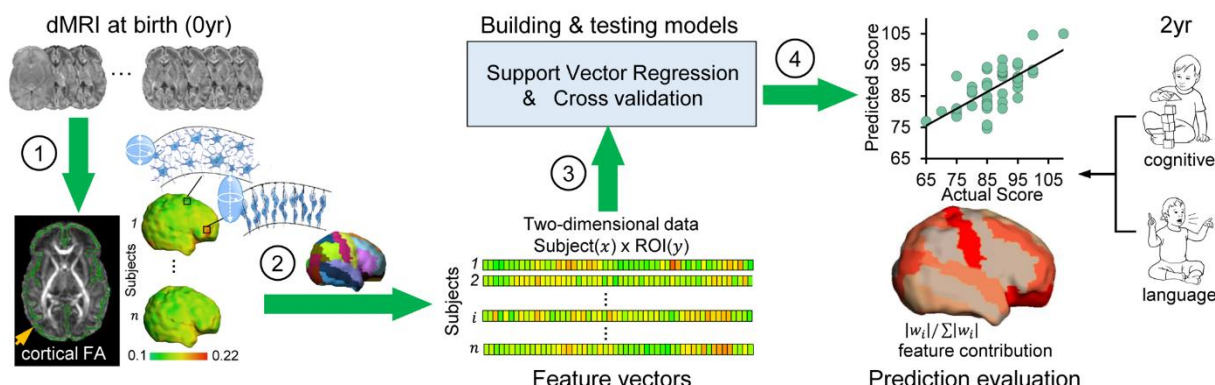

**Figure 1:** Workflow of predicting neurodevelopmental outcomes at 2 years based on cortical microstructural architecture at birth. Cortical microstructure at birth (0yr) quantified with cortical fractional anisotropy (FA) measures from diffusion MRI (dMRI) was used to predict cognitive and language abilities assessed with Bayley-III Scales at 2 years of age (2yr). The prediction workflow includes the following steps: (1) Cortical microstructure was measured at the “core” of cortical mantle, shown as green skeleton overlaid on a FA map and projected on a neonate cortical surface, to alleviate the partial volume effects. Schematic depiction of dendritic arborization and synaptic formation underlying cortical FA decreases during cortical microstructural maturation is shown. (2) Feature vectors were obtained by measuring cortical skeleton FA at parcellated cortical gyri with the gyral labeling transformed from a neonate atlas. Each parcellated cortical gyrus is a region-of-interests (ROI). (3) Prediction models were established and tested with support vector regression (SVR) and cross-validation. Feature vectors from all subjects were concatenated to obtain the input data of prediction models. (4) Prediction model accuracy was evaluated by correlation between predicted and actual scores. Feature contributions from different gyri in the model were quantified by normalized feature contribution weights which were projected back on a cortical surface for visualization.



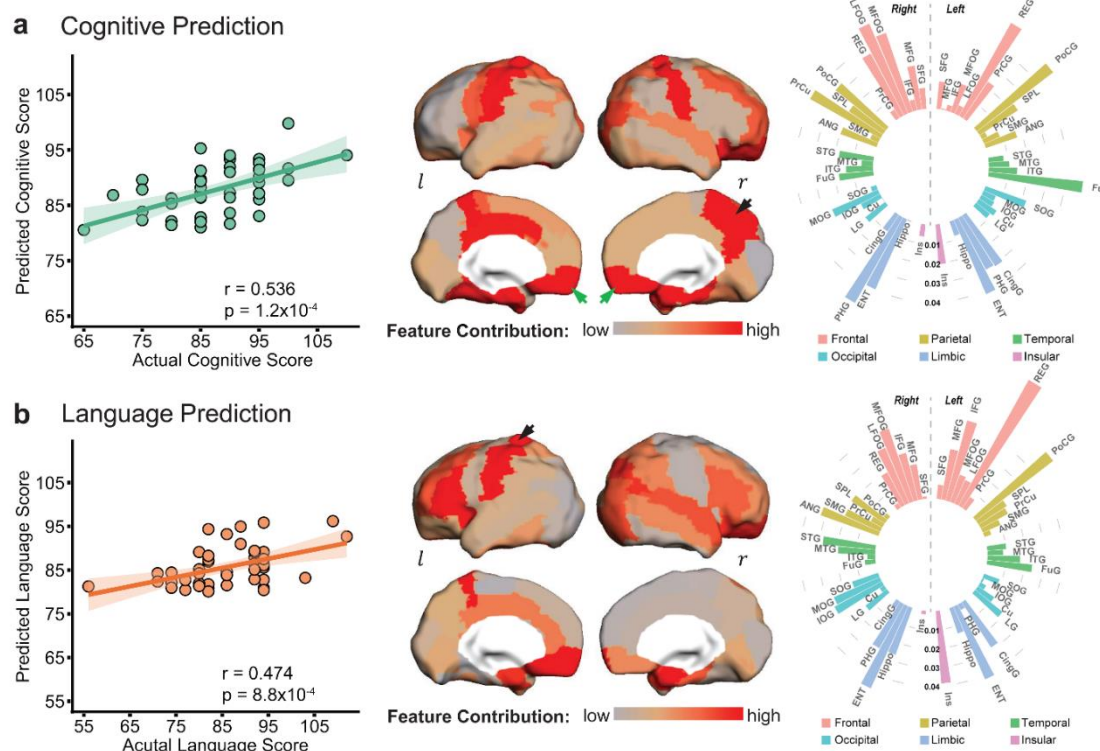

**Figure 2:** Cortical microstructural measures from neonate dMRI predict cognitive **(a)** and language **(b)** scores at 2 years of age with different feature contribution weights from various cortical gyri. *Left panels:* The scatter plots show significant correlation between actual scores and cognitive ( $r=0.536$ ,  $p=1.2 \times 10^{-4}$ ) or language ( $r=0.474$ ,  $p=8.8 \times 10^{-4}$ ) scores predicted based on cortical FA measures. Each dot represents one subject and linear regression was used to assess predictive accuracy of the model. The width of the line denotes the 95% confidence interval around the linear model fit between predicted and observed scores. *Center panels:* Normalized feature contribution weights of all cortical gyri in the prediction models are projected on a cortical surface. *Right panels:* Normalized feature contribution weights from all cortical gyri are demonstrated in the circular bar. These gyri were grouped into frontal, parietal, temporal, occipital, limbic and insular cortex. Abbreviation:  $r$  : right hemisphere.  $l$  : left hemisphere. See Supplementary Table 3 for abbreviations of cortical regions and values of normalized feature contribution weights from all cortical gyri.

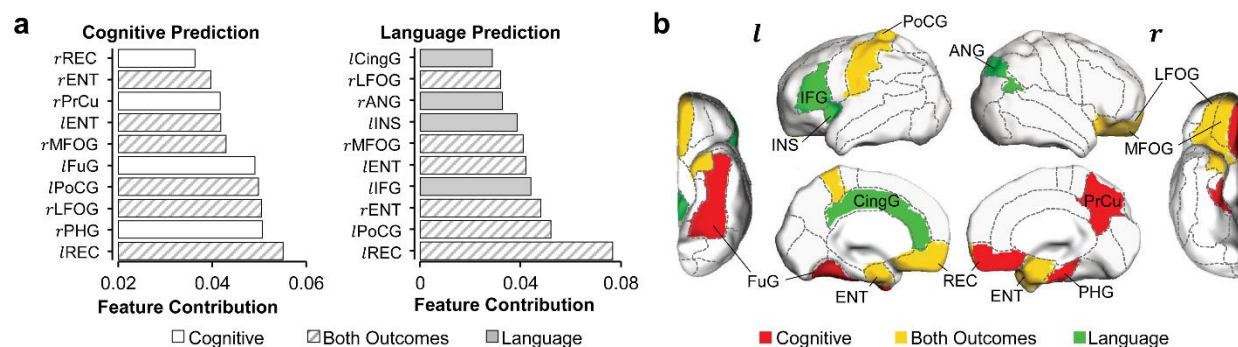

**Figure 3:** The top 10 cortical regions where microstructural measures contributed most to the prediction of cognitive and language scores. **a**, List of top 10 cortical regions with highest feature contribution weights in predicting cognitive (left) or language (right) scores. **b**, Maps of cortical regions listed in **a**. Cortical regions contributing most to predicting both cognition and language are painted in yellow (*r*MFOG, *r*LFOG, *l*REC, *l*PoCG, *r*ENT and *l*ENT); Cortical regions contributing most to predicting uniquely cognition and language are painted in red (*r*REC, *r*PrCu, *l*FuG and *r*PHG) and in green (*l*IFG, *l*CingG, *r*ANG and *l*INS), respectively. *Abbreviation*: *r*: right hemisphere. *l*: left hemisphere. ANG: angular gyrus. CingG: cingular gyrus. ENT: entorhinal gyrus. FuG: fusiform gyrus. IFG: inferior frontal gyrus. INS: insular cortex. LFOG: lateral fronto-orbital gyrus. MFOG: middle fronto-orbital gyrus. PHG: parahippocampal gyrus. PoCG: postcentral gyrus. PrCu: precuneus gyrus. REC: Rectus gyrus.



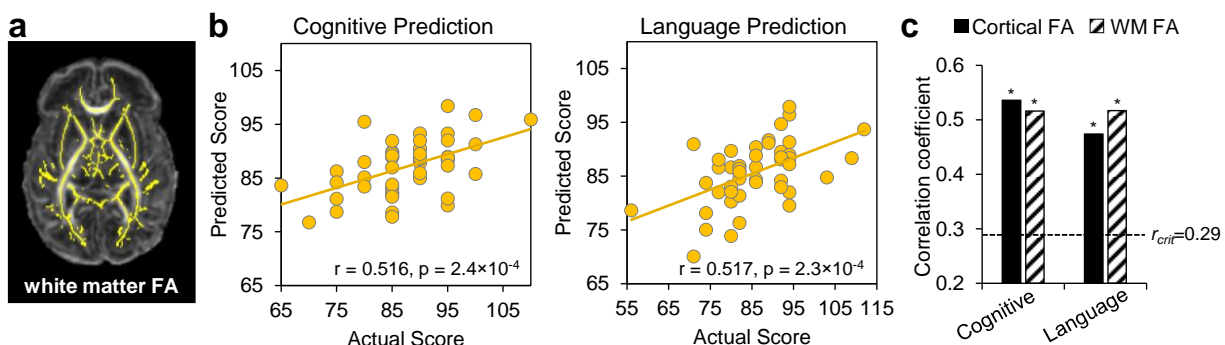

**Figure 4:** Prediction of neurodevelopmental outcomes using white matter (WM) FA features, compared with prediction using cortical FA features. **a**, WM microstructure was measured at the core WM regions, shown as yellow skeleton overlaid on a FA map of a neonate brain, to alleviate the partial volume effects. Feature vectors were obtained by measuring WM skeleton FA at 40 tracts transformed from WM labeling of a neonate atlas. **b**, Scatter plots show linear regressions between actual scores and the predicted cognitive or language scores based on WM FA measures with LOOCV. **c**, Significant correlation between the predicted and actual cognitive or language outcomes was found based on both cortical FA and WM FA feature vectors. Dashed line indicates critical  $r$  value corresponding to  $p=0.05$ . \* in the panel indicates significant ( $p<0.05$ ) correlation.

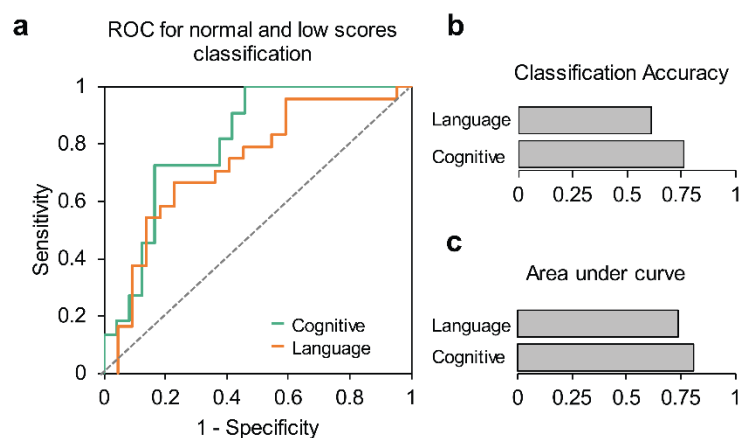

**Figure 5:** Evaluation of the prediction models. **a**, The receiver-operating-characteristic (ROC) plots show specificity and sensitivity with cortical microstructural measures used as features to classify normal ( $>85$ ) versus low ( $\leq 85$ ) cognitive or language scores. **b** and **c** show accuracy and area under ROC curve for language and cognitive classification model.

Supplementary Materials for

**Diffusion-MRI-based regional cortical microstructure at birth for predicting  
neurodevelopmental outcomes at 2 years of age**

Minhui Ouyang<sup>1</sup>, Qinmu Peng<sup>1,2</sup>, Tina Jeon<sup>1</sup>, Roy Heyne<sup>3</sup>, Lina Chalak<sup>3</sup>, Hao Huang<sup>1,2\*</sup>

<sup>1</sup>Radiology Research, Children's Hospital of Philadelphia, PA, United States

<sup>2</sup>Department of Radiology, Perelman School of Medicine, University of Pennsylvania, PA, United States

<sup>3</sup>Department of Pediatrics, University of Texas Southwestern Medical Center, Dallas, TX, United States

\*Corresponding Author:

Hao Huang, Ph.D.

34th street and Civic Center blvd,  
Philadelphia, PA 19104;

## Supplementary Methods

Quality control and quality assurance of MRI. General MRI slice and slice-time integral measures for quality control (QC) were determined daily using ADNI and BIRN phantoms. Any systematic anomaly identified by significant deflections from normal variation was addressed immediately with technical support and/or the in-house MR physicist team. As is the laboratory practice, test-retest reliability of the MR imaging protocol was assessed with a 4 subject X 4 repeat estimation on intra- and inter-subject variation for quality assurance (QA).

Diffusion MRI tensor fitting. With 30 scanned diffusion weighted image (DWI) volumes and 2 repetitions, we accepted those scanned diffusion MRI datasets with less than 5 DWI volumes affected by motion more commonly seen in scanning of neonates and toddlers. Diffusion MRI datasets from all neonates were preprocessed using *DTIstudio* (<http://www.mristudio.org>) (Jiang et al., 2006). Small motion and eddy current of dMRI for each neonate were corrected by registering all the DWIs to the non-diffusion weighted b0 image using a 12-parameter (affine) linear image registration with automated image registration algorithm. Six elements of diffusion tensor were fitted in each voxel. Maps of fractional anisotropy (FA) derived from diffusion tensor were obtained for all neonates (Fig. 1).

Bootstrap analysis for assessing reproducibility. We used a bootstrap sampling approach to assess reproducibility of top 10 cortical regions where microstructural measures contributed most to predicting each outcome in leave-one-out cross-validation (LOOCV) analysis. Specifically, we randomly selected 90% of the total 46 samples 1000 times. We then built cognition or language prediction model with each set of selected samples and identified top 10 cortical regions with highest contribution to the prediction of cognitive or language outcome. In each of 1000 bootstrap resamples, if any cortical region was identified as top 10 cortical regions contributing to predicting cognition outcome, the count for this specific cortical region was added by 1. After testing with 1000 resamples, a percentage of a certain cortical region was calculated as the total count for this region divided by 1000. In this way, a percentage map of all cortical gyri for predicting

cognitive outcome can be created. The same procedure was repeated with 1000 bootstrap resamples for predicting language outcome. If the top 10 cortical regions where microstructural measures contributed most to predicting each outcome in LOOCV analysis (Fig. 3) overlaps with the cortical regions with high percentage, it indicated that the top 10 cortical regions identified by LOOCV analysis were highly reproducible.

*Permutation tests to assess unique regional contribution to predicting cognitive or language*

*outcomes.* To quantify the extent of distinction between the set of top 10 cortical regions in cognition prediction model and the set of top 10 cortical regions in language prediction model, we defined a nonoverlapping index as the number of nonoverlapped regions between these two sets divided by the number of regions in their union set. This nonoverlapping index ranges from 0 to 1, with 1 indicating completely distinctive sets of regions and 0 indicating completely same sets of regions. A permutation test was used to evaluate the statistical significance of the observed nonoverlapping index. The null hypothesis is that the observed nonoverlapping index from predicting two different outcomes is not different from a distribution of nonoverlapping index calculated from predicting same (cognitive or language) outcome. The null distribution of nonoverlapping indices was generated by calculating 2070 nonoverlapping indices with each corresponding to one of 1035 pairs of cognitive-cognitive outcome or one of 1035 pairs of language-language outcome using leave-one-out resamples. The p value of reported nonoverlapping index is the probability of observing the reported nonoverlapping index by chance, and was calculated as the number of permutations with higher index value than reported index divided by the number of total permutations. We also conducted a more strict permutation test by increasing variability of the resamples. Specifically, the bootstrap resamples used in the section of “bootstrap analysis for assessing reproducibility” above was adopted to generate another null distribution of nonoverlapping indices and calculate the p value of observed nonoverlapping index by using the same procedures described above.

*Additional evaluation of prediction model.* To investigate effect of cortical parcellation schemes on the cortical FA measures in prediction model, various cortical parcellation schemes, including 52 cortical regions from the neonate atlas labeling (Feng et al., 2019), 128, 256, 512 and 1024 randomly parcellated cortical regions with equal size (Zalesky et al., 2010) were tested. For each parcellation scheme, averaged value of skeletonized FA measurements in each cortical region-of-interest (ROI) was used as a feature in the support vector regression (SVR) model to test prediction performance. To address a possible confounding factor of various neonate gestational ages at scan, we evaluated if the prediction performance of cortical FA measures remained high after controlling for ages at scan following the age correction methods described in the literature (Dukart et al., 2011). Specifically, age effect in the cortical FA of each gyrus (Ouyang et al., 2019) or each parcellated ROI was adjusted with linear regression between cortical FA and age. The cortical FA residuals in the linear regression model, considered as age adjusted cortical FA measures, were then used as features in SVR models for predicting the Bayley-III scores.

## Supplementary Results

Cortical FA at birth and neurodevelopmental outcomes at 2 years of age: Cortical FA distributions across parcellated cortical gyri in the left and right hemisphere from 46 infants who also went through neurodevelopmental assessments with Bayley-III at their 2-years of age are shown in Supplementary Fig. 1 and Fig. 2, respectively. Individual variability of cortical microstructure at each parcellated cortical region across these 46 infants is clearly demonstrated in these two figures. The Bayley-III cognitive, language and motor scores at 2 years of age from the same cohort of 46 infants as those shown in Supplementary Fig. 1 and Fig. 2 is shown in Supplementary Fig. 3, with mean and standard deviation of these scores listed in Supplementary Table 2.

Reproducible and unique regional contribution to predicting cognitive or language outcomes: As shown in Supplementary Fig. 4, the cortical regions with higher percentages (indicating higher reproducibility) in red or brown color overlap with the top 10 cortical regions where microstructural measures contributed most to predicting cognition or language (from Fig. 3; highlighted by dashed blue contours). Supplementary Fig. 4 indicated that the top 10 cortical regions from Fig. 3 are highly reproducible with various bootstrap resamples. The observed nonoverlapping index, ranging from 0 to 1 with 1 indicating completely distinctive regions and 0 indicating same regions, for assessing unique regional contribution to predicting cognitive or language outcomes is 0.57. The permutation tests indicated that the observed nonoverlapping index of 0.57 was not likely to be obtained by chance from predicting the same outcome ( $p=0.001$  from testing with leave-one-out resamples;  $p=0.05$  from testing with resamples by randomly selecting 90% of samples), supporting unique regional contribution to predicting cognitive or language outcomes.

Evaluate different cortical parcellation schemes: To investigate the effect of cortical parcellation scheme on prediction models, we measured regional FA values with different cortical parcellation schemes, including higher numbers of cortical parcellation (128, 256, 512, and 1024 random cortical parcels shown in Supplementary Fig. 5). Correlation and mean absolute error (MAE) between the actual and predicted neurodevelopmental scores were provided in Supplementary

Fig. 5. Across different cortical parcellation schemes, accurate estimation of the cognitive and language scores was observed in all prediction models. The best estimation achieved for predicting both cognitive and language scores prediction for language was based on parcellation of 128 random cortical parcels, characterized with highest correlation coefficient ( $r = 0.677$  for cognitive and  $r = 0.548$  for language outcome).

Evaluate the effect of different scan ages on the prediction models. We also investigated the effect of different scan ages on prediction models to demonstrate that high prediction performance remained intact after statistically controlling for age effect in cortical FA measures. Prediction performances before and after adjustment for the age effects are demonstrated in Supplementary Fig. 5b and Fig 5c. After the differences of scan age were statistically controlled (see Supplementary Method section for details), correlations between the predicted and actual cognitive or language scores are still significant ( $p < 0.05$ ). And significant correlations after controlling for age effect were observed across different cortical parcellation schemes.



# Supplementary Figures:

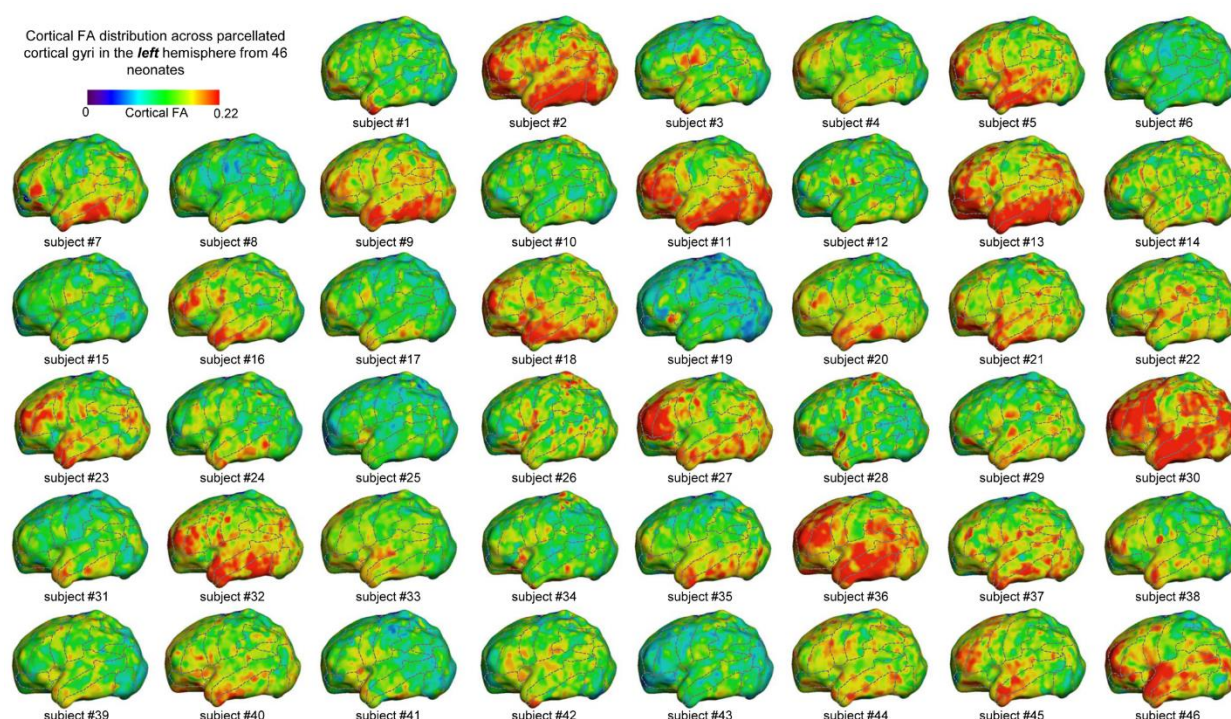

**Supplementary Figure 1.** Cortical FA distribution across parcellated cortical gyri in the left hemisphere from 46 infants who also went through neurodevelopmental assessments with Bayley III at their 2-years of age. Colorbar on the upper left corner encodes the cortical FA values. The dashed lines demonstrate the boundaries among the parcellated cortical gyri.

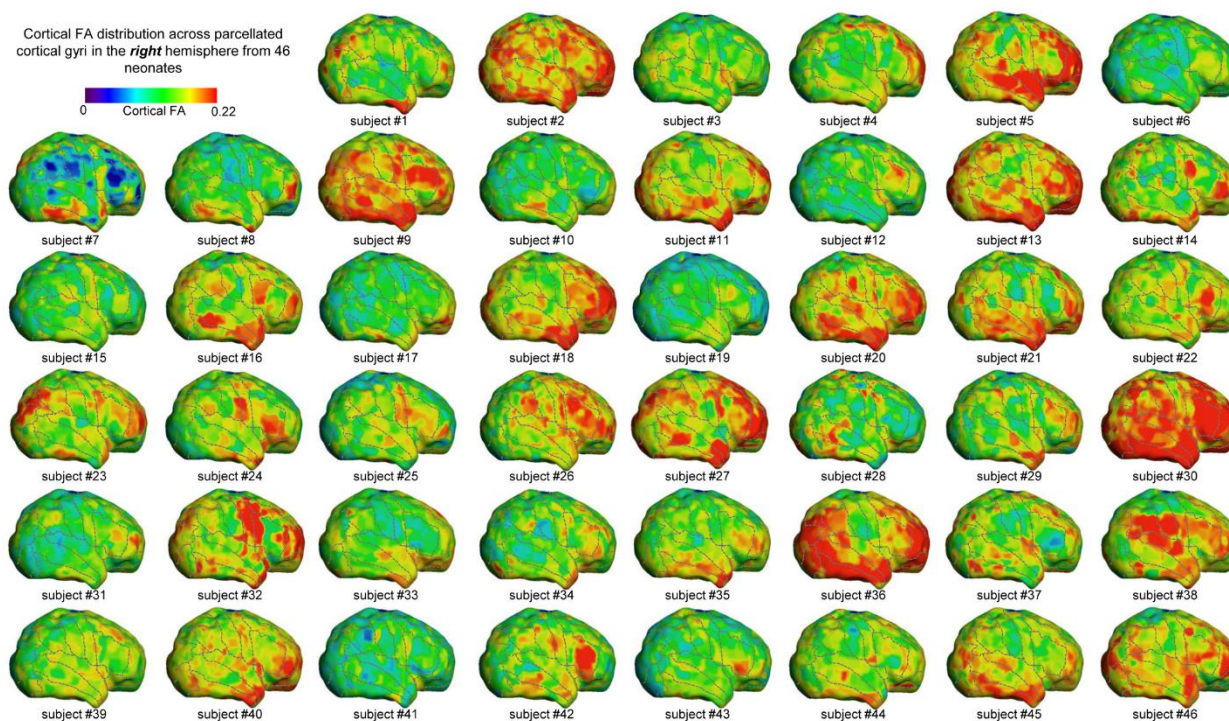

**Supplementary Figure 2.** Cortical FA distribution across parcellated cortical gyri in the right hemisphere from 46 infants who also went through neurodevelopmental assessments with Bayley III at their 2-years of age. Colorbar on the upper left corner encodes the cortical FA values. The dashed lines demonstrate the boundaries among the parcellated cortical gyri.

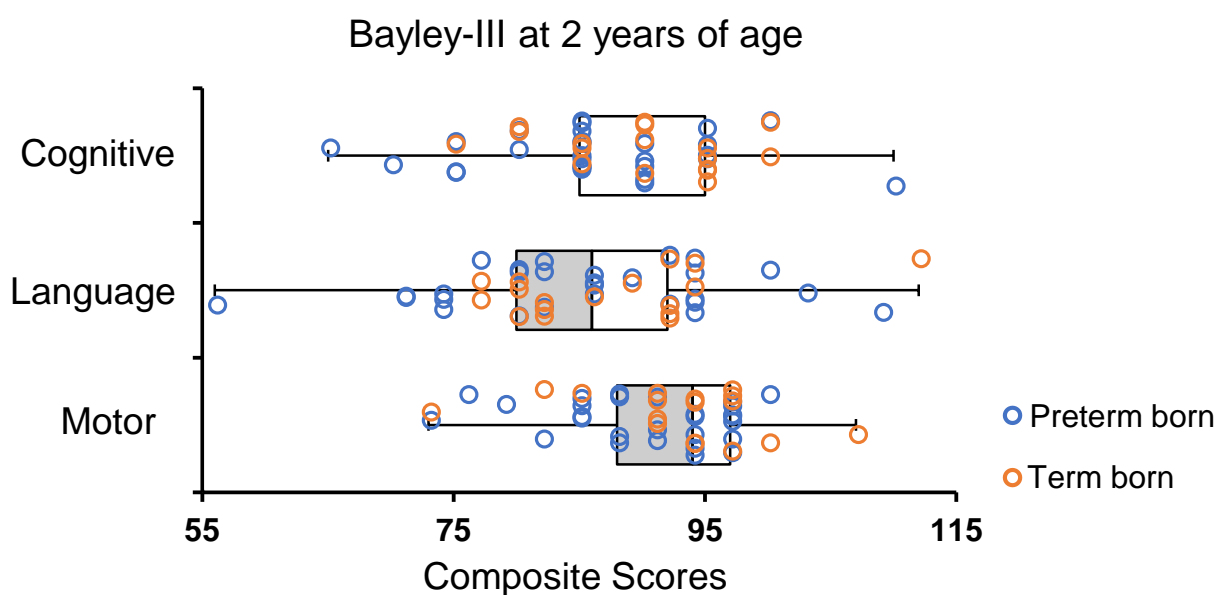

**Supplementary Figure 3.** Distribution of the Bayley-III cognitive, language and motor composite scores of the studied population.

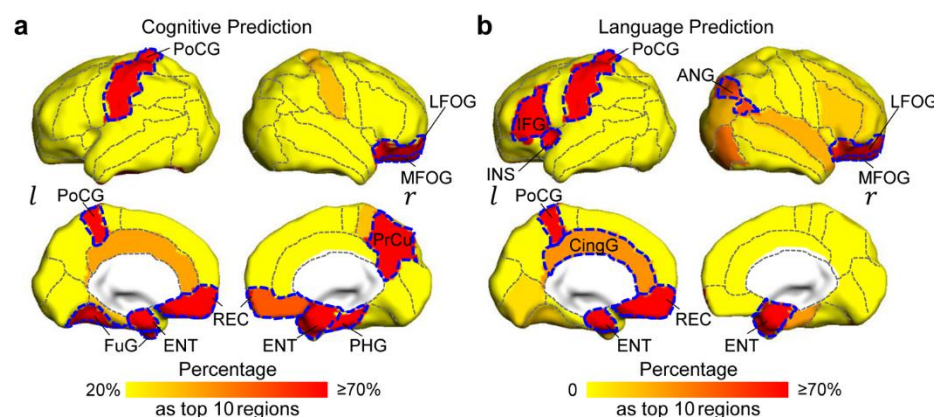

**Supplementary Figure 4.** Percentage maps for evaluating reproducibility of top 10 cortical regions with highest feature contribution to predicting cognition (a) and language (b) outcomes from bootstrap analysis. Regions with high percentage (highlighted by red and brown) are consistent with the top 10 cortical regions (from Fig. 3, highlighted by dashed blue contour), demonstrating high regional reproducibility for contributing to predicting a specific (cognitive or language) outcome.



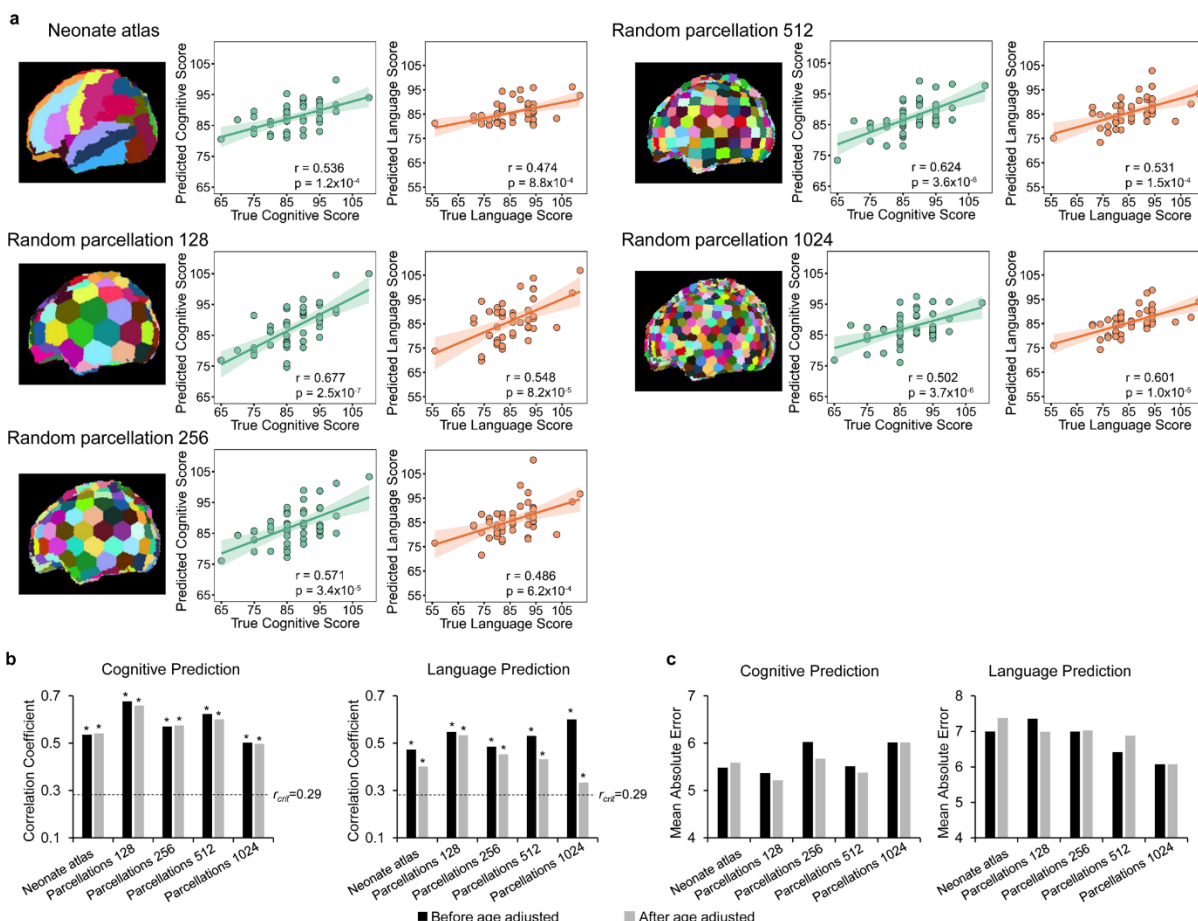

**Supplementary Figure 5.** Evaluation of robustness of prediction models with different cortical ROI schemes, and age adjustments. **a**, Various cortical region-of-interest (ROI) schemes, including 52 cortical regions from the neonate atlas labeling, 128, 256, 512 and 1024 randomly parcellated cortical regions with equal size, were tested by using cortical FA measured at these ROIs as features in prediction models. The scatter plots show the linear regressions between actual scores and the predicted cognitive or language scores based on the cortical FA measures obtained with various ROI schemes. **b**, Significant correlations between the predicted and actual cognitive and language scores were found for all ROI schemes before age adjustment, and all ROI schemes after age adjustments. Dashed lines indicate critical  $r$  value corresponding to  $p=0.05$ . \* in the panel indicates significant ( $p<0.05$ ) correlation. **c**, Mean absolute error with all ROI schemes, and age adjustment are shown.

## Supplementary Tables:

**Supplementary Table 1:** Demographics of participating subjects who went through MRI scans at birth, and assessed with Bayley tests at their 2 years of age. <sup>a</sup>C for C-section and V for vaginal birth; <sup>b</sup> B for breast-feeding and F for formula.

| Group       |          | n  | Age range (wks) | Age mean (wks) | Weight range (kgs) | Weight mean (kgs) | Male n(%) | White n(%) | Mode of delivery <sup>a</sup> | Feeding practice <sup>b</sup> | Antibiotic exposure during pregnancy |
|-------------|----------|----|-----------------|----------------|--------------------|-------------------|-----------|------------|-------------------------------|-------------------------------|--------------------------------------|
| MRI scan    | At birth | 87 | 26.0-41.4       | 33.6           | 0.8-4.1            | 2.1               | 58 (67)   | 61(70)     | C:33; V:54                    | B: 87; F: 0                   | Yes                                  |
|             | At scan  |    | 31.9-41.7       | 37.0           | 1.4-4.1            | 2.5               |           |            |                               |                               |                                      |
| Bayley exam | At birth | 46 | 25.0-41.4       | 32.4           | 0.8-3.9            | 1.8               | 33 (72)   | 34(74)     | C: 17; V: 29                  | B: 46; F: 0                   | Yes                                  |
|             | At scan  |    | 31.9-41.7       | 36.7           | 1.4-3.9            | 2.4               |           |            |                               |                               |                                      |

**Supplementary Table 2:** Mean and standard deviation of the composite scores from the 2-year Bayley-III neurodevelopmental assessments of the 46 infants as well as r and p values of the correlation between one of the composite scores and a specific age (birth age, scan age or Bayley-III assessment age).

| Bayley scale | n (>85) | Mean (SD)   | Correlation with age |         |          |         |            |         |
|--------------|---------|-------------|----------------------|---------|----------|---------|------------|---------|
|              |         |             | Birth age            |         | Scan age |         | Bayley age |         |
|              |         |             | r value              | p value | r value  | p value | r value    | p value |
| Cognitive    | 46 (22) | 87.4 (8.5)  | 0.003                | 0.98    | 0.247    | 0.11    | -0.037     | 0.81    |
| Language     | 46 (24) | 85.7 (10.1) | -0.009               | 0.95    | 0.251    | 0.10    | -0.052     | 0.74    |
| Motor        | 46 (37) | 91.2 (7.1)  | 0.096                | 0.53    | 0.244    | 0.11    | -0.089     | 0.57    |

**Supplementary Table 3:** Normalized feature contribution weights of cortical FA measures from each gyrus in cognitive and language prediction models. The top 10 highest weights in each model are marked in bold.

| Lobes/cortices | Gyri                         | Gyrus abbreviation | Cognitive prediction |                  | Language prediction |                  |
|----------------|------------------------------|--------------------|----------------------|------------------|---------------------|------------------|
|                |                              |                    | Left Hemisphere      | Right Hemisphere | Left Hemisphere     | Right Hemisphere |
| Frontal lobe   | Superior frontal gyrus       | SFG                | 0.014                | 0.011            | 0.008               | 0.001            |
|                | Middle frontal gyrus         | MFG                | 0.001                | 0.023            | 0.027               | 0.019            |
|                | Inferior frontal gyrus       | IFG                | 0.003                | 0.006            | <b>0.044</b>        | 0.026            |
|                | Medial fronto-orbital gyrus  | MFOG               | 0.016                | <b>0.043</b>     | 0.015               | <b>0.041</b>     |
|                | Lateral fronto-orbital gyrus | LFOG               | 0.005                | <b>0.050</b>     | 0.014               | <b>0.032</b>     |
|                | Gyrus rectus                 | REG                | <b>0.055</b>         | <b>0.036</b>     | <b>0.077</b>        | 0.020            |
|                | Precentral gyrus             | PrCG               | 0.023                | 0.005            | 0.007               | 0.003            |
| Parietal lobe  | Postcentral gyrus            | PoCG               | <b>0.050</b>         | 0.033            | <b>0.052</b>        | 0.003            |
|                | Superior parietal lobule     | SPL                | 0.024                | 0.021            | 0.018               | 0.021            |
|                | Precuneus                    | PrCu               | 0.003                | <b>0.042</b>     | 0.016               | 0.007            |
|                | Supramarginal gyrus          | SMG                | 0.009                | 0.005            | 0.010               | 0.021            |
|                | Angular gyrus                | ANG                | 0.017                | 0.020            | 0.004               | <b>0.033</b>     |
| Temporal lobe  | Superior temporal gyrus      | STG                | 0.008                | 0.018            | 0.010               | 0.028            |
|                | Middle temporal gyrus        | MTG                | 0.011                | 0.006            | 0.008               | 0.020            |
|                | Inferior temporal gyrus      | ITG                | 0.015                | 0.014            | 0.017               | 0.004            |
|                | Fusiform gyrus               | FuG                | <b>0.049</b>         | 0.018            | 0.024               | 0.006            |
| Occipital lobe | Superior occipital gyrus     | SOG                | 0.022                | 0.003            | 0.009               | 0.015            |
|                | Middle occipital gyrus       | MOG                | 0.007                | 0.026            | 0.001               | 0.027            |
|                | Inferior occipital gyrus     | IOG                | 0.008                | 0.011            | 0.003               | 0.029            |
|                | Cuneus                       | Cu                 | 0.011                | 0.000            | 0.010               | 0.003            |
|                | Lyngual gyrus                | LG                 | 0.009                | 0.013            | 0.019               | 0.014            |
| Limbic lobe    | Cingular gyrus               | CingG              | 0.031                | 0.010            | <b>0.029</b>        | 0.004            |
|                | Parahippocampal gyrus        | PHG                | 0.030                | <b>0.051</b>     | 0.003               | 0.027            |
|                | Entorhinal cortex            | ENT                | <b>0.042</b>         | <b>0.040</b>     | <b>0.042</b>        | <b>0.048</b>     |
|                | Hippocampus                  | Hippo              | 0.008                | 0.000            | 0.014               | 0.027            |
| Insular        | Insular cortex               | Ins                | 0.021                | 0.006            | <b>0.039</b>        | 0.002            |



## Supplementary References:

- Dukart, J., Schroeter, M.L., Mueller, K. & Alzheimer's Disease Neuroimaging Initiative. (2011). Age correction in dementia—matching to a healthy brain. *PloS One* **6(7)**, e22193. DOI: <https://doi.org/10.1371/journal.pone.0022193>
- Feng, L., Li, H., Oishi, K., Mishra, V., Song, L., Peng, Q., Ouyang, M., Wang, J., Slinger, M., Jeon, T., Lee, L., Heyne, R., Chalak, L., Peng, Y., Liu, S. & Huang, H. (2019). Age-specific gray and white matter DTI atlas for human brain at 33, 36 and 39 postmenstrual weeks. *NeuroImage* **185**, 685-698. DOI: <https://doi.org/10.1016/j.neuroimage.2018.06.069>
- Jiang, H., van Zijl, P.C., Kim, J., Pearlson, G.D. & Mori, S. (2006). DtiStudio: resource program for diffusion tensor computation and fiber bundle tracking. *Comput. Methods Programs Biomed.* **81**, 106-116. DOI: <https://doi.org/10.1016/j.cmpb.2005.08.004>
- Ouyang, M., Jeon, T., Sotiras, A., Peng, Q., Mishra, V., Halovanic, C., Chen, M., Chalak, L., Rollins, N., Roberts, T.P., Davatzikos, C. & Huang, H. (2019). Differential cortical microstructural maturation in the preterm human brain with diffusion kurtosis and tensor imaging. *Proc. Natl Acad. Sci. USA* **116(10)**, 4681-4688. DOI: <https://doi.org/10.1073/pnas.1812156116>
- Zalesky, A., Fornito, A. & Bullmore, E.T. (2010). Network-based statistic: identifying differences in brain networks. *Neuroimage*, **53(4)**, 1197-1207. DOI: <https://doi.org/10.1016/j.neuroimage.2010.06.041>
